# Supplementary material for: Dimers and chains of {3d–4f} single molecule magnets constructed from heterobimetallic tectons
Source: Royal Society of Chemistry journal article supplement (doi:10.1039/b925425k), 2010-01-01
Supplement: b925425k.pdf [file b925425k.pdf]

**ELECTRONIC SUPPLEMENTARY INFORMATION**

**Dimers and chains of {3d-4f} single molecule magnets constructed from heterobimetallic tectons**

**Traian D. Pasatoiu, Mael Etienne, Augustin M. Madalan, Marius Andruh, Roberta Sessoli**

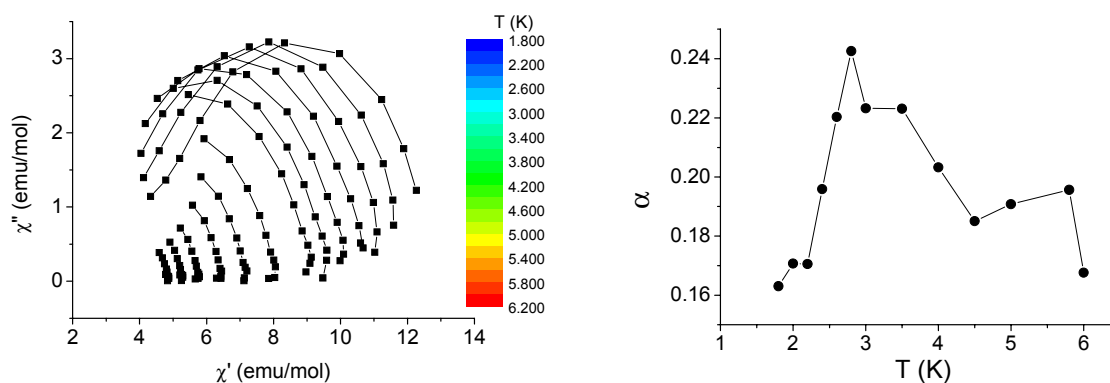

**Figure S1.** On the left the Argand plot of compound **1** at different temperatures (see colour scale) is reported. The extracted temperature dependence of the width of the distribution of the relaxation times ( $\alpha$  parameter) is reported on the right.

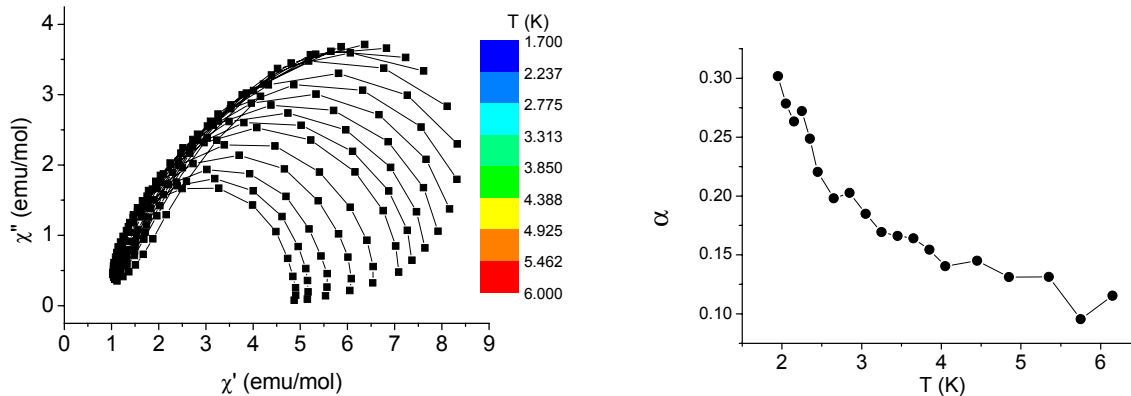

**Figure S2.** On the left the Argand plot of compound **2** at different temperatures (see colour scale) is reported. The extracted temperature dependence of the width of the distribution of the relaxation times ( $\alpha$  parameter) is reported on the right.
